# Supplementary material for: Bombyx mori Ecdysone Receptor B1 May Inhibit BmNPV Infection by Triggering Apoptosis
Source: MDPI journal article supplement (doi:10.3390/insects14060505), 2023-05-31
Supplement: s1 [file s1]

## Supplementary Materials

### *Bombyx mori* Ecdysone Receptor B1 May Inhibit BmNPV Infection by Triggering Apoptosis

**Table S1.** The list of accession numbers of BmEcR-B1 homologous in other species.

| Species                       | Accession No.  |
|-------------------------------|----------------|
| <i>Bombyx mandarina</i>       | XP_028037877.1 |
| <i>Galleria mellonella</i>    | XP_026757745.1 |
| <i>Trichoplusia ni</i>        | XP_026744328.1 |
| <i>Manduca sexta</i>          | XP_030038451.1 |
| <i>Spodoptera frugiperda</i>  | XP_035436715.1 |
| <i>Helicoverpa zea</i>        | XP_047021243.1 |
| <i>Spodoptera exigua</i>      | ACA30302.1     |
| <i>Helicoverpa armigera</i>   | XP_021181319.1 |
| <i>Thalassodes immissaria</i> | UNA06120.1     |
| <i>Spodoptera littoralis</i>  | ADO64595.1     |
| <i>Spodoptera litura</i>      | AFK27930.1     |
| <i>Adoxophyes honmai</i>      | BBD75650.1     |
| <i>Antheraea pernyi</i>       | ARD05165.1     |
| <i>Ectropis obliqua</i>       | AKC43542.1     |

**Table S2.** The list of accession numbers of BmEcR-A homologous in other species

| Species                         | Accession No.  |
|---------------------------------|----------------|
| <i>Manduca sexta</i>            | XP_030038436.1 |
| <i>Spodoptera exigua</i>        | ADK66917.1     |
| <i>Omphisa fuscidentalis</i>    | ABS00248.1     |
| <i>Colias croceus</i>           | XP_045491669.1 |
| <i>Helicoverpa armigera</i>     | XP_049695177.1 |
| <i>Pieris rapae</i>             | XP_022112668.1 |
| <i>Pieris napi</i>              | XP_047512054.1 |
| <i>Pieris brassicae</i>         | XP_045532683.1 |
| <i>Zerene cesonia</i>           | XP_038215878.1 |
| <i>Hyposmocoma kahamanoa</i>    | XP_026330046.1 |
| <i>Spodoptera frugiperda</i>    | XP_035436717.1 |
| <i>Colias croceus</i>           | XP_045491666.1 |
| <i>Ostrinia furnacalis</i>      | XP_028170773.1 |
| <i>Spodoptera litura</i>        | XP_022819531.1 |
| <i>Choristoneura fumiferana</i> | AAC61596.2:1   |
| <i>Vanessa cardui</i>           | XP_046964987.1 |
| <i>Nymphalis io</i>             | XP_050345605.1 |
| <i>Maniola jurtina</i>          | XP_045785074.1 |
| <i>Chilo suppressalis</i>       | BAC11713.1     |
| <i>Papilio machaon</i>          | XP_014370464.1 |
| <i>Pectinophora gossypiella</i> | XP_049867465.1 |
| <i>Maniola hyperantus</i>       | XP_034840655.1 |

|                                    |                |
|------------------------------------|----------------|
| <i>Danaus plexippus</i>            | XP_032513501.1 |
| <i>Plutella xylostella</i>         | XP_037973369.1 |
| <i>Leguminivora glycinivorella</i> | XP_047988112.1 |
| <i>Conopomorpha sinensis</i>       | AQQ79920.1     |
| <i>Aricia agestis</i>              | XP_041977718.1 |
| <i>Plutella xylostella</i>         | XP_037973367.1 |
| <i>Anticarsia gemmatilis</i>       | UBY12696.1     |
| <i>Spodoptera litura</i>           | AFC87968.1     |

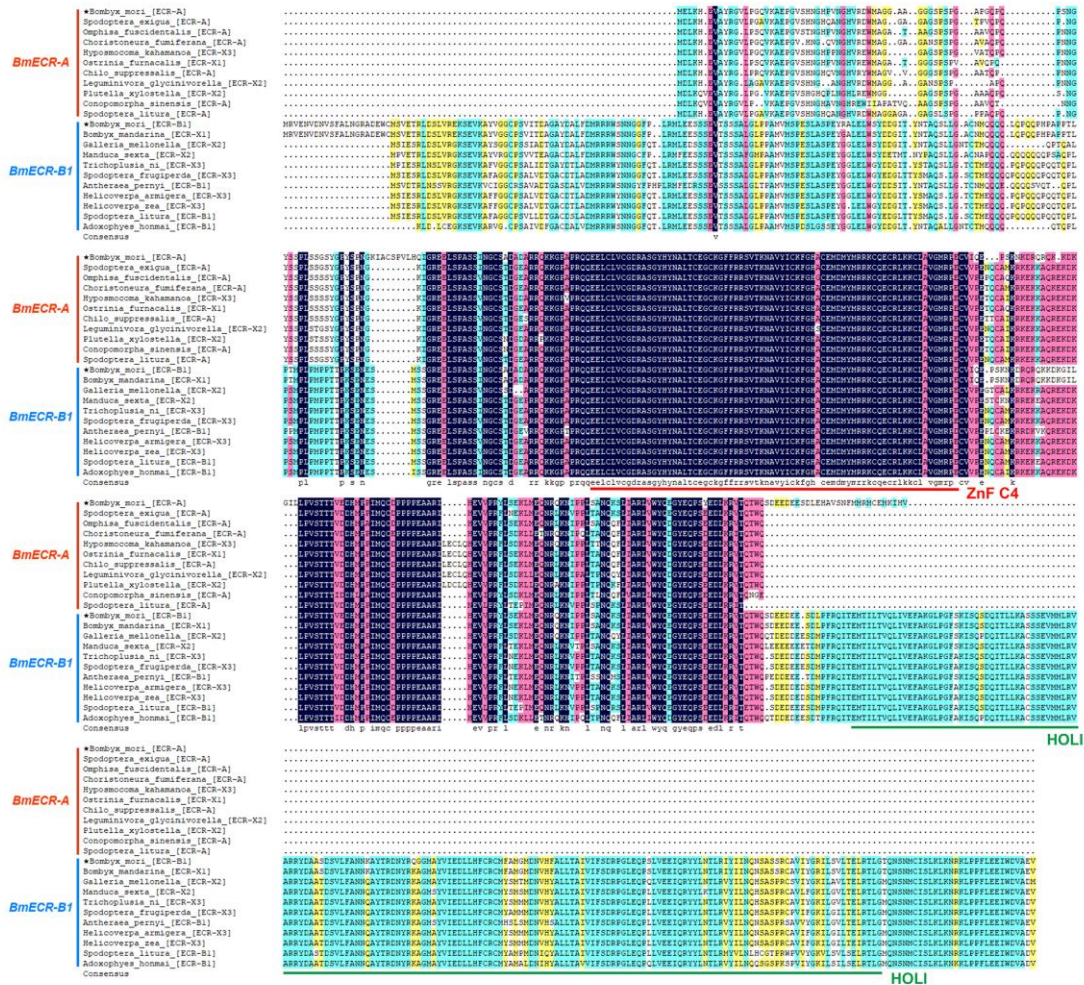

**Figure S1.** homologous alignment of the Ecr-A and Ecr-B1 amino acid sequences in different species. The amino acid sequence of the ZnF C4 domain is conserved in BmEcr-A and BmEcr-B1, while the HOLI domain is absent in BmEcr-A. The conserved amino acid sequence is highlighted in navy blue. The differential sequence is highlighted in pink, yellow, and light blue. The red underline denotes the ZnF C4 domain, and the green underline denotes the HOLI domain. ★, *Bombyx mori*.

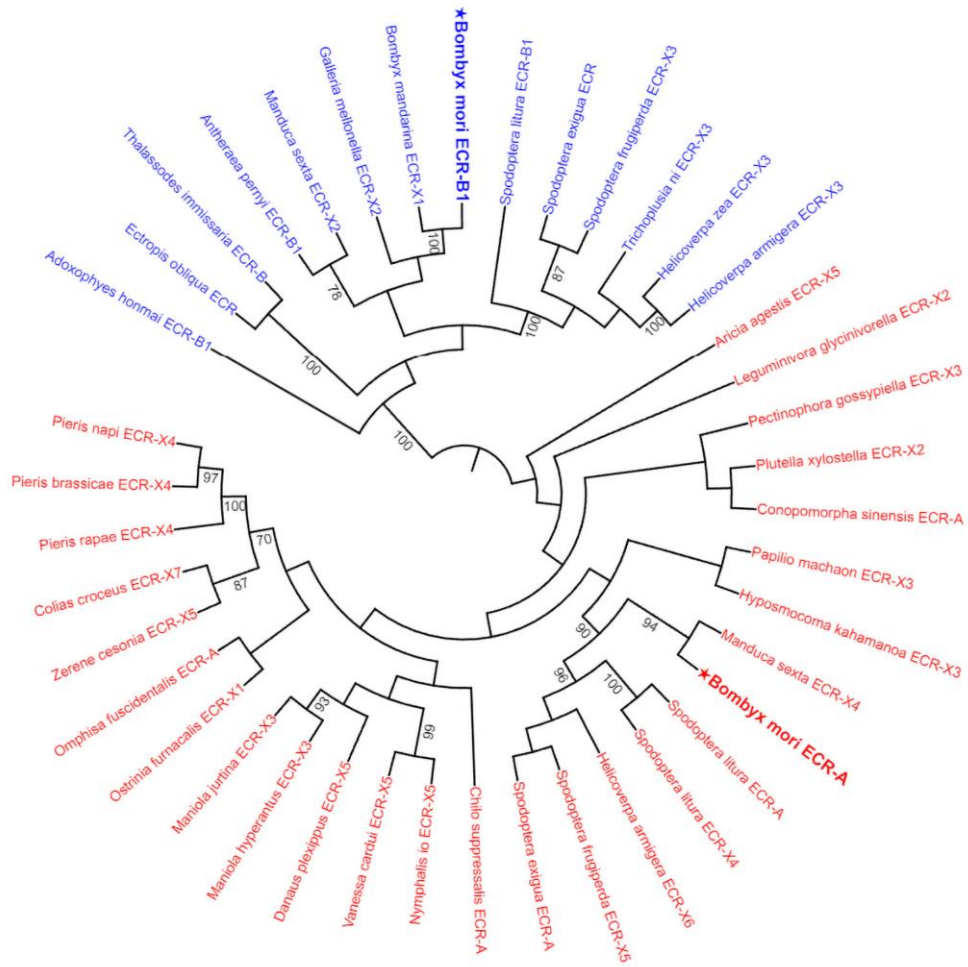

**Figure S2.** the phylogenetic tree of EcR-A and EcR-B1 in different species. The evolutionary relationship of EcR-A and EcR-B1 in different species was clustered into two separate groups, suggesting the function of BmEcR-B1 might be different from that of BmEcR-A. The star denotes EcR-A and EcR-B1 in *Bombyx mori*. BmEcR-B1 and its homologs are in blue, and BmEcR-A and its homologs are in red.

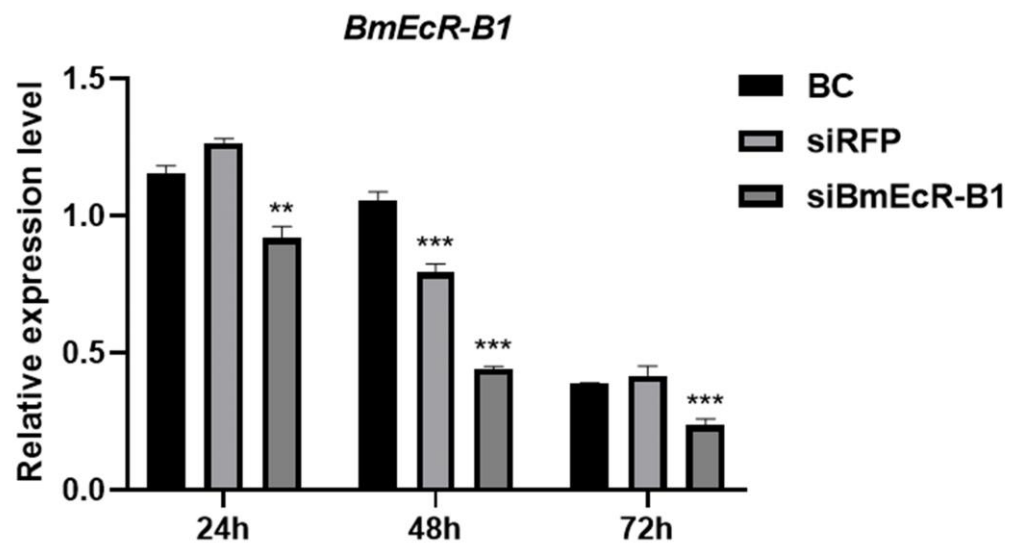

**Figure S3.** analysis of *BmEcR-B1* expression in BmN cells following 24 h, 48 h, and 72 h of siEcR-B1 transfection. .
